# Supplementary material for: Phosphodiesterase 1A physically interacts with YTHDF2 and reinforces the progression of non-small cell lung cancer
Source: eLife journal article supplement (doi:10.7554/elife.98903), 2024-10-15
Supplement: fig6-figsupp1-data1 [file elife-98903-fig6-figsupp1-data1-v1.pdf]

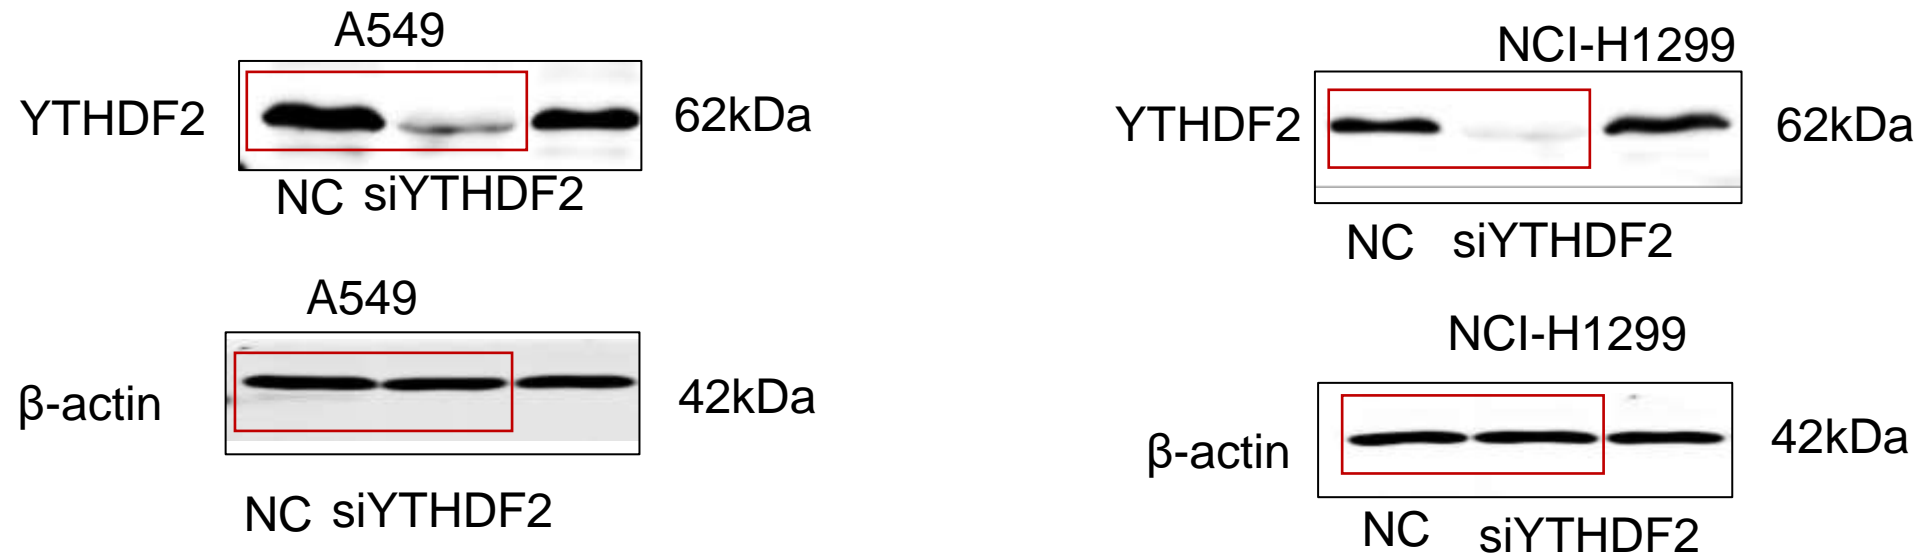

Figure 6—figure supplement 1. Non-small cell lung cancer (NSCLC) cells were transfected with control siRNA and YTHDF2 siRNA for 48 hr, and the knockdown efficiency of YTHDF2 was confirmed by western blot.
