# Supplementary material for: Phosphodiesterase 1A physically interacts with YTHDF2 and reinforces the progression of non-small cell lung cancer
Source: eLife. 2025 Jul 24;13:RP98903. doi: 10.7554/eLife.98903 (PMC12289305; doi:10.7554/eLife.98903)
Supplement: Supplementary file 1. [file elife-98903-supp1.xlsx]

## Sheet: Sheet1
Supplementary file 1：The siRNA sequence used for knocking down indicated genes
siRNA	Sense(5’-3’)
siPDE1A-1	CCACGUGAGUGCAGCUUAUTT
siPDE1A-2	CCAGCAGCUGUCAUCGUAATT
siPDE1B-1	GCUGGAAGCCGUCUACAUATT
siPDE1B-2	GCUGCAGCUAUCCAUGAUUTT
siPDE1C-1	GCUUCAGUGGUAGAUCUUATT
siPDE1C-2	CCAGCUGUUAUUGAGGCAUTT
siSTAT3	CCACUUUGGUGUUUCAUAATT
siYTHDF2	AAGGACGTTCCCAATAGCCAA
