# Supplementary material for: Phosphodiesterase 1A physically interacts with YTHDF2 and reinforces the progression of non-small cell lung cancer
Source: eLife. 2025 Jul 24;13:RP98903. doi: 10.7554/eLife.98903 (PMC12289305; doi:10.7554/eLife.98903)
Supplement: Supplementary file 2. [file elife-98903-supp2.xlsx]

## Sheet: Sheet1
Supplementary file 2: Primers sequences for detecting the expression of indicated genes
Primer	Sequences
PDE1A	Forward: 5'-CAGTAACAGATGAGCTGC-3'
	Reverse: 5'-GTATTCCTTTCAGGC G-3'
E-cadherin	Forward: 5'-GAACGCATTGCCACATACAC-3'
	Reverse: 5'-GAATTCGGGCTTGTTGTCAT-3'
N-cadherin	Forward: 5'- CTCCTATGAGTGGAACAGGAACG-3'
	Reverse: 5'-TTGGATCAATGTCATATTCAAGTGCTGTA-3'
Slug	Forward: 5'-CGT TTT TCC AGA CCC TGGTT-3'
	Reverse: 5'-CTGCAGATGAGCCCTCAG A-3'
YTHDF2	Forward: 5'-TAGCCAACTGCGACACATTC-3'
	Reverse: 5'-CACGACCTTGACGTTCCTTT-3'
SOCS2	Forward: 5'-TGCAAGGATAAGCGGACAGG-3'
	Reverse: 5'-CAGAGATGGTGCTGACGTGT-3'
GAPDH	Forward: 5'-GAGTCAACGGATTTGGTCGT-3'
	Reverse: 5'-TTGATTTTGGAGGGATCTCG-3'
